## 1 Title

2 Monodisperse drops templated by 3D-structured microparticles

## 3 Authors

4 Chueh-Yu Wu<sup>1</sup>, Bao Wang<sup>2</sup>, Joseph de Rutte<sup>1</sup>, Mengxing Ouyang<sup>1</sup>, Alexis Joo<sup>1</sup>, Matthew Jacobs<sup>2</sup>,  
5 Kyung Ha<sup>2</sup>, Andrea L. Bertozzi<sup>2,3,4</sup>, Dino Di Carlo<sup>1,3,4,5\*</sup>

## 6 Affiliations

7 <sup>1</sup>Department of Bioengineering, University of California, Los Angeles.

8 <sup>2</sup>Department of Mathematics, University of California, Los Angeles.

9 <sup>3</sup>Department of Mechanical and Aerospace Engineering, University of California, Los Angeles.

10 <sup>4</sup>California NanoSystems Institute, University of California, Los Angeles.

11 <sup>5</sup>Jonsson Comprehensive Cancer Center, University of California, Los Angeles.

12 \*Correspondence to: dicarlo@ucla.edu

## 13 Abstract

14 The ability to create uniform sub-nanoliter compartments using microfluidic control has enabled new  
15 approaches for analysis of single cells and molecules. However, specialized instruments or expertise  
16 have been required, slowing the adoption of these cutting-edge applications. Here, we show that 3D-  
17 structured microparticles with sculpted surface chemistries template uniformly-sized aqueous drops  
18 when simply mixed with two immiscible fluid phases. In contrast to traditional emulsions, particle-  
19 templated drops of a controlled volume occupy a minimum in the interfacial energy of the system, such  
20 that a stable monodisperse state results with simple and reproducible formation conditions. We describe  
21 techniques to manufacture microscale drop-carrier particles and show that emulsions created with these  
22 particles prevent molecular exchange, concentrating reactions within the drops, laying a foundation for  
23 sensitive compartmentalized assays with minimal instrumentation.

## 24 MAIN TEXT

### 25 Introduction

26 The ability to break up a fluid volume into many uniformly-sized compartments that do not cross-talk  
27 underlies a number of applications in life science research and diagnostics. Microfluidic technologies  
28 have been used to create uniform isolated volumes in microscale wells<sup>1,2,3,4</sup>, valved chambers<sup>5,6</sup>, or  
29 through the generation of monodisperse drops from co-flowing streams of water and oil<sup>7,8,9,10,11</sup>.  
30 Breaking up a sample volume into smaller uniform compartments enables the concentration of single  
31 entities (e.g. cells or molecules) in a subset of these compartments while minimizing background,  
32 leading to increased sensitivity and reduced reaction time. Leveraging these capabilities, microfluidic  
33 compartmentalization approaches have led to significant advances in counting individual nucleic acids  
34 and proteins (i.e. enabling digital PCR and digital ELISA)<sup>12,13,14,15,16</sup> as well as analyzing individual cells  
35 based on their secretions or molecular components. The association of a solid phase with each  
36 compartment also enables surface-based reactions and barcoding, which has led to transformative  
37 applications in single-cell analysis and chemical synthesis<sup>14,15,17,18,19</sup>, but can be limited by random  
38 encapsulation processes<sup>19</sup>.

39 Although providing significant value, the need for significant microfluidics expertise or new  
40 chips and costly commercial instruments to perform compartmentalization and measurement has slowed  
41 the adoption of these technologies. In a laboratory setting, expertise in microfabrication and clean room  
42 infrastructure is necessary to manufacture microfluidic chips; moreover skills in operation of  
43 microfluidic devices and development of custom optical or electronic readers is needed even if one has  
44 microfluidic chips available. Alternatively, a potential user can acquire commercial instruments that are  
45 customized for each particular application (e.g. digital PCR, single-cell RNA-seq, digital ELISA), often

53 with multiple instruments needed to first break up the fluid sample into small volumes, and then analyze  
54 those volumes.

55 A fundamental challenge has been that a collection of droplets in an immiscible fluid are only  
56 metastable, requiring energy to create them and surface effects to help stabilize the interface between the  
57 two immiscible phases<sup>20,21,22,23</sup>. Precise control of flow rate/pressure with complex instrumentation are  
58 needed to stably generate uniform drop volumes, and specialized surfactants are needed to stabilize this  
59 out-of-equilibrium state. Coalescence of drops leads to thermodynamic equilibrium, resulting in non-  
60 uniform drop sizes that can change with temperature or time. Instead of addressing this challenge by  
61 controlling the fluid dynamics of breakup or kinetics of re-coalescence, we focus on engineering the  
62 interfacial energy of a drop as a function of volume. We probe how changes to the functional form of  
63 this volume-energy landscape could result in the robust creation of uniform drop sizes,  
64 thermodynamically promoting drop breakup above a critical volume.

65 By modulating the volume-energy landscape of a growing drop using microscale particles, we  
66 describe a mechanism to create uniform nanoliter-scale aqueous compartments with simple mixing and  
67 centrifugation steps. Drops are captured by 3D structured microscale particles – drop-carrier particles  
68 (DCPs) – comprising materials with tailored interfacial tensions: an inner hydrophilic layer and outer  
69 hydrophobic layer (Fig. 1, Supplementary Fig. 1). We generate uniform drops by mixing, pipetting, or  
70 agitating a system with DCPs, aqueous, and immiscible phases. One **drop** is associated with each  
71 **particle**, an assembly we refer to as a **dropicle**, which differs from conventional emulsions that are  
72 stabilized by amphiphile surfactants or Pickering emulsions that are stabilized by a multitude of  
73 nanoparticles<sup>24,25</sup>. We show how pairs of C-shaped DCPs moved apart in space split volumes unevenly  
74 above a critical volume, with one DCP associated with a preferred volume. Multiple such pairwise  
75 interactions can give rise to a strong mode in the distribution of volumes across a set of interacting and  
76 splitting dropicles<sup>26</sup>. We provide a framework for understanding and controlling this behavior in terms  
77 of engineering the Volume-Energy curve (V-E curve) for a DCP. We also demonstrate an approach to  
78 manufacture DCPs at the microscale, overcoming challenges with patterning materials with different  
79 wetting properties into a 3D shaped microstructure. Once DCPs are manufactured, tens of thousands of  
80 dropicles can be formed simultaneously in parallel by simply pipetting for 30 seconds, which  
81 corresponds to kilohertz drop production rates. Finally, we show that drops generated using this  
82 approach are compatible with enzymatic bioassays.

83 A main advantage of our approach is the ability to centrally manufacture drop-carrier particles  
84 that can be distributed to end users without expertise in microfluidics and liquid handling. These users  
85 can then develop assays using monodisperse nanoliter-scale drops through simple shaking and agitation  
86 using widely available laboratory equipment. We expect that a number of assays previously  
87 demonstrated using lab on a chip infrastructure could be implemented in this “lab on a particle” format  
88 in the future, providing greater access to the deployment of powerful biological assays.

## 91 Results:

92 *Theory of dropicle formation.* In a two-phase system, the interfacial energy increases linearly with  
93 surface area; for an isolated sphere of volume ( $V=4\pi r^3/3$ ), the energy scales as  $4\pi r^2 \sim V^{(2/3)}$  (Fig. 2A), a  
94 concave function of volume. For spherical drop emulsions, there is no local minimum in drop size and  
95 coalescence of adjacent drops is favored due to the overall decrease in surface area. If the volume vs.  
96 interfacial energy (V-E) relationship is instead convex, it is energetically favorable for a drop to split  
97 into equal volumes. This process of splitting will continue ad infinitum, again leading to no local  
98 minimum in drop size. However, if a V-E curve transitions from convex to concave, a drop splitting into  
99 two daughter drops is expected to break evenly for smaller volumes and break symmetry for larger  
100 volumes, with one holding a preferred volume close to the inflection point in the V-E curve, and the  
101 other containing the remaining volume (Supplementary Fig. 2). For an overall fluid volume exceeding  
102 the number of drops multiplied by the preferred drop volume for each drop, this process of asymmetric  
103 splitting is expected to accumulate drops with the preferred volume.

We hypothesize such a convex-concave functional form is achievable using microstructures at the length scale commensurate with the desired drop size. Practically, an initial concave region of the V-E curve is expected for small volumes as a small drop behaves as a spherical cap on a surface until it achieves dimensions commensurate with the confining microstructure. This “spreading” phase at low volume, in which increasing volume is accompanied by a decreasing rate of increase in surface energy (concave energy), sets the stage for an “inflationary” phase (convex energy) wherein interfacial energy increases more rapidly with increasing volume as the drop fills the microstructure dimensions. Finally, at larger volumes, the V-E curve returns to a concave form consistent with the behavior of a free drop. These conditions are not met with simple topologies such as drops interacting with planes or parallel plates (Supplementary Fig. 3), indicating additional confining surfaces are required, with a trade-off that increasing confinement inhibits drop loading.

*Physical implementation.* Drop-carrier particles (DCPs) interacting with a wetting fluid create unique energy minima in the V-E relationship leading to thermodynamic stabilization of drops of specified volumes (Fig. 2). Balancing the need for confined wetting surfaces while also enabling entry of fluid, we design DCPs as C-shaped particles consisting of an inner hydrophilic region and outer hydrophobic layer (Fig. 1). The stable dropicle configuration is simulated using a volume-constrained minimal surface algorithm for the two solid and two fluid phases<sup>16</sup>. The method is an MBO scheme with auction dynamics for the volume constraint (Methods). Our numerical model indicates an initial spreading phase as a low volume of the dispersed fluid forms a single spherical cap (Fig. 2A, location i). A reduced slope in the V-E curve corresponds to the formation of a bridging catenoid (Fig. 2A, locations ii-iii). At intermediate volumes, the drop interacts with more than two surfaces and a local maximum is observed (Fig. 2A, locations iii-iv). Once the interior volume is filled, we observe an inflationary phase in which energy increases with volume at an enhanced rate (Fig. 2A, between locations iv-v). At even larger volumes, the behavior approaches the asymptotic condition of a spherical drop (Fig. 2A), returning to a concave V-E relation. Therefore, DCPs interacting with a fluid volume yield V-E curves satisfying sufficient criteria to split asymmetrically and would accumulate preferred volumes based on our theory (Fig. 2B).

The model also provides information on the contact angles that support stable drops for this DCP design. Generally, the dispersed phase should wet the internal region of the DCP ( $\theta_{in} < 90^\circ$ ) and the external region should not be more wetting than the internal region ( $\theta_{out} > \theta_{in}$ ). Outside of this regime, complex non-filling configurations were observed in our simulations. Additional considerations for practical design of DCPs are also necessary (Methods).

*Experimental observation of asymmetric splitting.* We experimentally observe splitting behavior for a volume spanning two centimeter-scale DCPs that are slowly separated. The system is large enough to precisely control the position of neighboring particles while small enough so that capillary effects dominate the mechanics (Fig. 2B-C, Video S1-S2, Supplementary Fig. 4). We adjusted the density of the fluids and separation speed of DCPs to maintain a Bond number and Reynolds number  $\ll 1$ . For example, we utilized PPG as a continuous phase to match the density between the aqueous and oil phases. At different aqueous volumes in a single DCP, we experimentally observe transitions in drop morphology matching the theoretical transitions from a spherical cap, to bridging catenoid on the narrowest approach of the C-shape, followed by filling of the inner cup of the C, and finally wetting of the entire inner surface and filling of the interior volume (Fig. 2B). For the splitting of drops spanning two DCPs, we observed two main regimes that strikingly matched theoretical predictions based on the V-E curves (Fig. 2C). Instead of splitting evenly for all volumes, we found there was one regime where daughter volumes were partitioned evenly (total volumes,  $V_N$ , of  $\sim 2-4V_0$ , where  $V_0$  is the volume at the local minimum of energy), but above a critical total volume of  $\sim 4V_0$  one of the daughter volumes is at a fixed preferred volume, independent of the total volume. For example, for total volumes  $> 4V_0$ , the smaller daughter drop maintained a quite uniform preferred volume of  $1.59 \pm 0.14V_0$ . Notably, the volume with energy minimum at  $V_0$  falls close to the inflection point volume of 2.09, where we see a change in curvature from convex to concave in the V-E relation for a DCP. This analysis can be

156 extended to multiple DCPs holding a range of different fluid volumes that are merging and splitting as  
157 they are mixed. Given the asymmetric splitting behavior this system is expected to lead to accumulation  
158 of DCPs holding the preferred volume while one DCP holds any remaining volume.

159 *Optical transient liquid molding enables manufacture of microscale drop-carrier particles.* We  
160 manufacture DCPs at two orders of magnitude smaller length scale ( $\sim 100 \mu\text{m}$ ), addressing the  
161 challenges of manufacturing particles (i) comprising two materials with differing interfacial energies,  
162 viscosity, and density in complex shapes at the microscale, and (ii) scaling the manufacture to  
163 automatically produce a sufficient number of uniform particles for large scale experiments. We  
164 manufacture DCPs using an optofluidic technique we developed called optical transient liquid molding  
165 (OTLM)<sup>27</sup>, in which we co-flow separate pre-polymer solutions of poly(ethylene glycol) diacrylate  
166 (PEGDA) and poly(propylene glycol) diacrylate (PPGDA), shape the streams to the desired cross-  
167 sectional morphology in a microchannel flow, and then photo-crosslink this configuration. The particle  
168 shape is sculpted along one direction using inertial fluid effects and in an orthogonal direction using  
169 photolithographic processes<sup>27,28</sup> (Fig. 3A, Methods).

170 We successfully manufacture microparticles comprising two separate materials with different miscibility  
171 properties, and substantial differences in viscosity<sup>27</sup>. When two precursor fluids are employed in  
172 OTLM, the precursors should be miscible with each other to avoid the effects of finite interfacial tension  
173 at the interface of the co-flow which would act against the deformation generated by flow inertia. Here,  
174 we leveraged the ability to make PEGDA and PPGDA miscible with each other when suspended in  
175 ethanol. Moreover, to eliminate the asymmetry created by the density difference between the co-flowing  
176 streams, which can lead to differential settling over a finite flow stopping time<sup>29</sup>, PEGDA and PPGDA  
177 are diluted to 60% and 90% respectively v/v with ethanol so the density of all liquids is matched at  
178 0.987 g/mL. The viscosity of the PPGDA solution (38.9 mPa sec) is approximately five times the  
179 viscosity of the PEGDA solution (7.0 mPa sec), however, this difference does not lead to significant  
180 changes in the flow shape. We tune the concentration of the photoinitiator (PI) in the two precursors so  
181 that the speed of the photocrosslinking is uniform between the two materials in the final cured particles.  
182 The concentration of PI is 1.3% and 2.6% in diluted PEGDA and PPGDA respectively. These conditions  
183 lead to successful polymerization of both precursors as contiguous particles (Fig. 1, Fig. 3B), where a  
184 difference in optical contrast between the two material components of the particles is easily observable.  
185 We confirm the presence of the inner PEG layer by incubating with the fluorescent dye, resorufin, which  
186 selectively partitions into PEG compared to PPG (Fig. 3C)<sup>30</sup>.

187 We manufacture DCPs with different shapes in large batches using parallel exposure through a mask  
188 aligned along the downstream channel length (Fig. 3A). By shifting the position of the UV illumination  
189 through the mask location, different shaped DCPs are formed (Fig. 3B). All three types of DCPs possess  
190 an internal PEG region, but differ in the degree of encapsulation of this region by the outer PPG layer.  
191 Although all particle types can contain stable aqueous droplets, we focus on DCPs with the highest level  
192 of encapsulation (i.e. enclosed DCPs) for most experiments reported herein. Because each exposure  
193 yields  $>30$  DCPs using the arrayed mask, we can achieve large batch sizes and throughput of  
194 manufacture through multiple cycles of flow shaping, stopping, and UV exposure (where a complete  
195 cycle required  $\sim 7$  seconds). Importantly, the process leads to uniform structures of DCPs across the  
196 length of the exposed channel (Fig. 3D). The cost to produce 15,000 DCPs with our current OTLM  
197 setup is estimated to be  $\sim \$45$ , which can be theoretically reduced to  $\sim \$4$  by extending the length of the  
198 downstream channel to  $\sim 24\text{cm}$  [28]. *Particle-shape uniformity.* We measure the dimensions of a  
199 population of DCPs in order to assess the reproducibility of the manufacturing process (Fig. 3D). Our  
200 theory suggests that the cavity size and wettability of the inner layer of a DCP govern the volume of a  
201 droplet that forms. The internal PEG layer surrounding the cavity had an area of  $20,000 \pm 1,400 \mu\text{m}^2$   
202 and the short and long axes of the void space encapsulated by the inner PEG layer are  $95 \pm 9 \mu\text{m}$  and  
203  $451 \pm 13 \mu\text{m}$ . Overall, the dimensions are uniform within 6.57% - a metric that helps define the minimum  
204 expected uniformity of the droplet dimensions.

205  
206 *Generation of droplets.* The protocol for producing droplets from DCPs requires no specialized  
207 equipment (Methods). We demonstrate successful droplet formation using a number of continuous

208 phases that are immiscible with water, including poly(dimethylsiloxane-co-diphenylsiloxane) (PSDS),  
209 PPG, decanol, and toluene. We identify effective protocols for dropicle generation for several  
210 continuous liquid phases. For low viscosity continuous phases like toluene and decanol, we disperse  
211 DCPs in the continuous phase first, since interactions with a small volume of aqueous sample is readily  
212 achievable through rapid mixing. For high viscosity continuous phases like PSDS, DCPs are first mixed  
213 with the aqueous sample to ensure there is enough interaction between the particles and the aqueous  
214 phase prior to mixing. We found that dropicle generation is largely insensitive to the process of mixing,  
215 e.g., pipetting or centrifugation, and the initial dispersion of DCPs in an aqueous or continuous phase.  
216 PSDS is chosen as an oil phase for biological proof-of-concept experiments described herein because we  
217 found there was modest transfer of water into this continuous phase over days (47 % and 17% loss in  
218 area and fluorescent intensity respectively within 2 days), suggesting compatibility with the timescale of  
219 enzymatic reactions (hours) or maintenance of cells (days).

220  
221 *Monodispersity.* Microscale dropicles formed in PSDS and toluene possess a preferred drop volume as  
222 suggested by theory and centimeter-scale experiments (Fig. 4A). The microstructure of the surrounding  
223 particles not only templates the drops in the emulsion (supporting a nominal diameter, ND, of  $\sim 200 \mu\text{m}$ )  
224 but also sustains their shape over a long period of time, resisting the usual coarsening process found in  
225 standard spherical drop emulsions. Once created, dropicles in toluene maintained the same mean volume  
226 for at least 3 days as long as the dispersed phase was prevented from evaporating (Supplementary Fig. 5)  
227 while dropicles formed in PSDS had a slow decay in volume over a 3 day period (Supplementary Fig.  
228 6). The drop ND is affected by the total volume of the aqueous phase in the experiment. For volumes  
229 less than a saturation value,  $\sim 20$  fold of the entire void volume of the particles, a high percentage of the  
230 population is only partially filled with the aqueous phase (Fig. 4B). Once filled, a strong mode in the  
231 distribution of nominal diameter is observed at  $\sim 200 \mu\text{m}$ , in agreement with theoretical predictions that  
232 asymmetric splitting occurs above a critical total volume for interacting DCPs, leading to a preferred  
233 volume accumulating in daughter drops (Fig. 2C).

234 Drop-carrier particle shape was shown to affect monodispersity (Fig. 4C). Enclosed particles (opening  
235 size of  $60 \mu\text{m}$ , which is 6% of the circumference of the interior cavity) had a tighter distribution,  $\text{CV} \sim$   
236 11%, and a well-defined mode in droplet ND. However, shorter aspect ratio particles with a wider  
237 opening ( $85 \mu\text{m}$ , blue diamonds,  $N=185$ ) have almost four-fold higher variation in size ( $\text{CV} \sim 38\%$ ). We  
238 observe that two or more particles with the larger opening can stably assemble around a single droplet  
239 (Fig. 4C, inset), leading to more variation in drop sizes. Thus a smaller opening is desirable for  
240 monodispersity of dropicles.

241  
242 *Monomorphology.* The distribution in the circularity of dropicles formed in toluene and PSDS is shown  
243 in Fig. 4D, showing a sharp contrast between a standard emulsion and our engineered system. In  
244 agreement with our centimeter-scale experiments, the shape of dropicles minimizes the interfacial  
245 energy of the system and is influenced by the DCP cavity shape, whereas surfactant-stabilized drops  
246 adopt spherical shapes to minimize energy.

247  
248 *Dropicles prevent crosstalk.* The ability to easily create monodisperse drops supported by a solid-phase  
249 opens up many new opportunities for molecular and cellular assays. One fundamental requirement for  
250 these assays is the ability to isolate compartments within the system to minimize molecular cross-talk.  
251 For conventional surfactant-stabilized droplets, surfactants can potentially enhance transportation of  
252 target molecules between phases depending on the properties of surfactants and target molecules [31].  
253 This contrasts with the dropicle system, in which the aqueous droplet is stabilized by only a solid phase  
254 without surfactants or with reduced quantity of surfactants, potentially minimizing cross-talk. DCPs also  
255 inhibit transfer of dye when agitating dropicles. After mixing dropicles containing separate dye solutions  
256 ( $0.6 \text{ kDa}$  and  $70 \text{ kDa}$  in size), in a toluene continuous phase, we observe the same respective populations  
257 of drops without significant exchange of the dye (Fig. 5A, Supplementary Fig. 7). Less than 9.6%  
258 transfer of the  $0.6 \text{ kDa}$  dye was observed on average while 7.4% transfer of the larger  $70 \text{ kDa}$  dye was  
259 observed after 4 minutes of dynamic agitation by pipetting. This minimal cross-talk following mixing

260 may result from the outer hydrophobic layer of the DCP yielding a physical barrier along with the  
261 thermodynamic stability of the supported drops.

262  
263 *Enzymatic assays in dropicles.* Leveraging the ability to prevent cross-talk between compartments, we  
264 demonstrate a solid-phase enzymatic reaction in which the fluorescent products of the reaction  
265 accumulate in dropicles formed in an enzyme-compatible PSDS continuous phase. We modify the inner  
266 PEG layer of the DCPs with biotin (Methods), incubate with streptavidin-labeled horseradish peroxidase  
267 (HRP), wash away unbound enzyme, and generate dropicles with aqueous QuantaRed reagent  
268 (Methods). After generation of dropicles, we incubate the system for various times to generate  
269 fluorescent resorufin product. HRP catalyzes the formation of resorufin, which accumulates in a dose-  
270 dependent fashion within the dropicle yielding an easily observed fluorescent signal within a 30 minute  
271 time period (Fig. 5B-C). Dropicles in which resorufin is enzymatically generated did not cross-talk with  
272 neighboring dropicles without reactions. We mix DCPs manufactured with and without biotin with 1 nM  
273 streptavidin-HRP and perform the QuantaRed assay as described above. After 24 hours of incubation we  
274 can easily distinguish the mean intensity levels in the dropicles with affinity to streptavidin-HRP and  
275 those without (Fig. 5D). Notably, the signal for the enzymatic turnover to resorufin shows similar  
276 intensity levels in these same particles incubated in separate wells, suggesting transport of product  
277 through the oil phase did not contribute to signal intensity (Fig. 5D). Moreover, the resorufin produced  
278 also accumulates in the inner PEG layer, yielding a higher fluorescent intensity in this layer, indicating  
279 the capability to concentrate signal in this region for future assays. For future applications, non-  
280 partitioning dyes can be chosen as the reporter in the assay, i.e., fluorescein. This proof-of-concept  
281 suggests that dropicles formed from PPG/PEG layered DCPs can be formed within continuous phases  
282 that are enzyme-compatible and prevent cross-talk, two key elements necessary for enzymatically  
283 amplified bioassays.

284 To summarize dropicles can form uniform drops and remain stable while modulating the transport of  
285 reporter dyes. Dropicles with a PSDS continuous phase preserve >80% of a small molecule dye after 2  
286 days in static conditions and >90% of 0.6 kDa and 70 kDa dyes after minutes of dynamic agitation.  
287 Notably, there is negligible cross-talk over days for resorufin. Exchange in static conditions is likely due  
288 to partitioning into the oil phase while in dynamic conditions is likely driven by transient interactions /  
289 collisions between dropicles. This is supported by the fact that exchange occurs at almost equal rates for  
290 both 0.6 kDa and 70 kDa dyes. Notably, these behaviors contrast with conventional droplets surrounded  
291 by fluorinated oil and formed with surfactant in static conditions. In these conditions transport of  
292 fluorescein occurs over days, resorufin over hours, and rhodamine over minutes [32].

## 294 Discussion

295 There is significant potential, across a range of fields, for the use of thermodynamically stabilized  
296 microdroplets associated with solid compartments. The ability for each compartment to be chemically  
297 modified with affinity ligands, nucleic acids, or sensing molecules is a key feature for future controlled  
298 biological reactions and barcoding. Because each microdroplet is associated with a chemically-defined  
299 compartment, and the compartment can be sized to hold only a single particle (Supplementary Fig. 8) or  
300 cell, limitations of Poisson loading of cells and beads in standard emulsions can be overcome<sup>19</sup>. Such  
301 systems enable single-molecule analysis and synthesis<sup>19,18,30</sup>, or a way to barcode molecules for single-  
302 cell analysis<sup>14,15</sup>. The digitized solid structure provides a general substrate to store information from  
303 reactions or impart new physical properties into monodisperse emulsions, such as modifications in  
304 shape, buoyancy, stiffness, magnetic properties<sup>27</sup>, or stimuli-responsiveness<sup>33</sup>, enabling new  
305 opportunities for “lab-on-a-particle” technologies.

## 307 Materials and Methods:

### 308 Auction dynamics simulations

309 *Droplet Encapsulation Simulation Preparation.* We start with a triangulated mesh defining the  
310 hydrophobic and hydrophilic surfaces of the drop-carrier particle. This is mapped to a 3D Cartesian grid  
311 in which we classify the Cartesian grids into one of four categories: hydrophobic, hydrophilic, droplet,

312 or oil domain. To achieve this, we apply the improved parity algorithm developed in for an Eulerian  
313 solvent excluded surface<sup>34</sup>. For a given point  $x$ , we draw a half-line emanating from  $x$  and count how  
314 often it crosses the triangles. The number of crosses determines the phase in which  $x$  is located in.  
315

316 *Droplet Encapsulation Simulation.* In the microscale particle droplet system, the dominant interaction  
317 comes from the surface tension between different phases. By ignoring the other forces, we solve for a  
318 minimum surface energy configuration using the Auction Dynamics algorithm<sup>35</sup> on the Cartesian grid.  
319 Auction dynamics generates a discrete timestep approximation of volume preserving mean curvature  
320 motion of the interfacial boundaries between phases, preserving the volumes of all the phases. As a  
321 result, configurations that are stationary under the flow are surface energy minimizers. We iterate the  
322 algorithm from an initially spherical droplet on top of the DCP and follow its evolution until it remains  
323 stationary under the auction dynamics.  
324

325 *Droplet Encapsulation System Post-processing.* We compute contact area of each pair of phases to  
326 further compute the surface energies of the energy minimization configuration. To systematically  
327 address this issue, we first smooth the initial non-smooth sharp interface by running a few steps of  
328 Laplacian smoothing. Then we apply the marching cubes algorithm<sup>36</sup> to extract the level set from the  
329 smeared interface. Finally, we triangulate the extracted level set by using the CGAL software and  
330 compute its contact area straightforwardly.  
331

### 332 **Design considerations for drop-carrier particles (DCPs)**

333 There are additional considerations for practical design of DCPs that are not accounted for in the model  
334 explained in the main text. For example, particles should be largely closed such that multi-particle  
335 supported drops<sup>37</sup> are energetically unfavorable and monodispersity is preserved (Fig, 4C). In addition,  
336 our model assumes that interfacial energies will dominate the behavior of the system, which is valid  
337 when factors such as buoyancy remain small. The Bond number,  $Bo = \Delta\rho g d^2 / \Delta\sigma$ , for our  
338 experimental system is  $\sim 4 \times 10^{-4}$ , reinforcing this assumption. Here,  $\Delta\rho$  is the density difference between  
339 the disperse and continuous phase,  $g$  is acceleration due to gravity,  $d$  is the width of the interior void of  
340 the drop-carrier particle, and  $\Delta\sigma$  is the difference between the interfacial tension of the disperse phase  
341 and continuous phase with the interfacial tension between the disperse phase and hydrophilic internal  
342 material. In our centimeter-scale system we also matched densities to achieve a  $Bo < 0.1$ . The interfacial  
343 tension of the outer hydrophobic material with the continuous phase should also be small compared to  
344 thermal energy to prevent aggregation of particles due to favorable particle-particle contacts on their  
345 outer surfaces.  
346

### 347 **Microfluidic channel design**

348 We designed the drop-carrier particles using custom software built in lab and open to the public, called  
349 uFlow<sup>38</sup>. uFlow enables rapid computation of a 3D particle shape formed from the intersection of an  
350 extrusion of the flow stream cross-sectional shape and an extrusion of an orthogonal 2D optical mask  
351 shape. Real-time design of the particle shape is possible since the advection maps associated with the  
352 inertial flow around a pre-simulated library of pillars is stored and the flow deformation from a pillar  
353 sequence is rapidly computed without fluid dynamic simulations. We discovered that six micropillars  
354 adjacent to the channel wall can generate a cross-sectional flow pattern with concentric layers with only  
355 a small opening on one side, which is suitable for drop-carrier particles when patterned with a  
356 rectangular optical mask (see inset of “cross-section of co-flow” in Fig. 3).  
357

### 358 **Microfluidic chip fabrication**

359 We fabricate microfluidic chips using soft lithography. The chips contain sequences of pillars designed  
360 to create the cross-sectional flow pattern with concentric layers of the precursor materials. The  
361 microchannel also contains a long downstream region after the pillars to expose a linear array of patterns  
362 to increase fabrication throughput. The silicon mold for replicating poly(dimethylsiloxane) PDMS

363 channels is 300  $\mu\text{m}$  in thickness and thus required a specialized process. We spin a first layer of SU-8  
364 2100 (MicroChem Corp.) to a thickness of 200  $\mu\text{m}$  onto a wafer, recover thermal stress, and spin a  
365 second layer of SU-8 with 100  $\mu\text{m}$  thickness. Then, we follow standard protocols for photolithography  
366 to develop the mold. We cure PDMS (Sylgard 184, Dow Corning) on top of the mold to replicate the  
367 microchannel, peel the PDMS device off the wafer, punch holes for inlets and an outlet, and bond it to a  
368 glass slide coated with a thin layer of PDMS using air plasma. The thin PDMS layer matches the surface  
369 properties across all walls of the microchannel. The PDMS precursor is spun on the slide at 1000 rpm  
370 for 30 seconds and cured in an oven overnight.

### 371 **Polymer precursors**

372 Poly(ethylene glycol) diacrylate (PEGDA,  $M_w \approx 575$ ; 437441, Sigma-Aldrich) and poly(propylene  
373 glycol) diacrylate (PPGDA,  $M_w \approx 800$ ; 455024, Sigma-Aldrich) are chosen to be the polymer precursors  
374 for the hydrophilic and hydrophobic layers of the drop-carrier particles respectively. These materials  
375 satisfy interfacial tension conditions of importance and are compatible with the OTLM process. The  
376 photoinitiator (2-hydroxy-2-methylpropiophenone, Darocur 1173, 405655, Sigma-Aldrich) is introduced  
377 with the two precursors.  
378

### 379 **Optical transient liquid molding**

380 We use optical transient liquid molding, comprising a flow shaping step followed by a UV exposure step,  
381 to manufacture drop-carrier particles<sup>27</sup>. First, we pump a co-flow of polymer precursors into a  
382 microchannel with a designed sequence of micropillars at a Reynolds number of 5 to 40. Fluid inertia of  
383 the flow around the micropillars leads to an irreversible deformation of an initial rectangular co-flow  
384 pattern to a complex cross-sectional pattern. A sequence of micropillars with various sizes and lateral  
385 positions can be used to design a wide diversity of cross-sectional patterns, including concave, convex,  
386 diamond, stretched bars, etc<sup>39</sup>. Once a pattern is developed downstream of the microchannel containing  
387 the micropillars, we rapidly stop the flow and equalize pressure in the channel by simultaneously  
388 stopping the upstream pump and occluding the outlet tubing downstream with a pinch valve. Within one  
389 second, we illuminate the sculpted precursor stream with a patterned UV light for 500 ms to  
390 photocrosslink the precursor stream and solidify multiple 3D-shaped particles. The patterned UV light is  
391 created by coupling collimated UV light to a chrome mask with an array of transparent rectangles ( $140 \times$   
392  $600 \mu\text{m}$ ). Following photocrosslinking, the downstream pinch valve is re-opened and the pump is  
393 restarted to flush cured particles into a container outside of the microchannel and to redevelop the  
394 precursor flow stream for the next UV illumination cycle. This manufacturing cycle is automated using  
395 LabVIEW to fabricate large batches of particles. We also confirm the reproducibility of particle shape  
396 across a population of the particles<sup>28</sup>.

397 After fabrication, all particles are collected in a 50 mL centrifuge tube and rinsed with a volume of  
398 ethanol more than 1000 times the sample volume to eliminate the effect of non-crosslinked reagents.  
399 The particles were stored in ethanol for later usage.  
400

### 401 **Protocol for dropicle generation**

402 *Protocol for dropicle generation: PSDS.* Two approaches are used to generate dropicles using PSDS as  
403 a continuous phase. In the first approach we disperse DCPs in an aqueous sample with 0.5% (w/v)  
404 Pluronic F-127. We let the DCPs settle in a glass vial and remove the supernatant until the aqueous  
405 volume is reduced to  $\sim < 50 \mu\text{L}$ . We inject 1 mL of PSDS into the vial and pipette the solution with DCPs,  
406 PSDS, and the aqueous phase 1~2 times. The DCPs are left to settle in the vial for about 30 minutes. If  
407 needed the supernatant of PSDS is exchanged to remove satellite drops without particles. In the second  
408 approach, used to track enzymatic turnover of a fluorogenic substrate in the same particles over time, the  
409 particles adhere to the bottom of a well plate for fluid transfer and compartmentalization operations.  
410 Specifically, particles suspended in ethanol are transferred to a well plate with a hydrophobic surface  
411 (Catalog number: 351143, Corning), and the medium is exchanged after three washes with phosphate-  
412 buffered saline (PBS) with 0.5% w/v Pluronic. To characterize the stability of the volume of dropicles  
413  
414



over time, food coloring dye (Catalog number: S05189, Fisher Scientific) dissolved in PBS (300  $\mu$ L) is used to visualize the stability of the volume of dropicles over time. Within seconds, the aqueous solution is fully dispersed around and inside the particle cavity, and excess liquid is removed while an aqueous phase remains trapped within particle cavities. Lastly, 500  $\mu$ L of PSDS is added on top of the particles to complete the compartmentalization of the aqueous phase.

*Protocol for dropicle generation: toluene.* To reduce the numbers of particle-free satellite drops and adhesion between particles and the glass container, we use a mix of toluene with 10-15% ethanol. Our protocol to create dropicles in toluene differs from PSDS as follows: (1) we disperse drop-carrier particles (initially in ethanol) in 1mL of the toluene/ethanol mix, (2) we inject a small volume of aqueous solution, typically  $\sim$ 20  $\mu$ L ( $\sim$ 17 times of the total void volume of particles), (3) we then pipette the solutions vigorously in a 20 mL scintillation glass vial (VWR) with a hydrophobic coating which is introduced by incubation with Rain-X (ITW Global Brands) for 2 days, (4) following mixing, we centrifuge down the solution in the vial at 2000 rpm for 5 minutes at 25°C, and (5) and finally pipette away any large visible satellite drops. We cover the vial with parafilm for long-term storage. Moreover, we also confirm that the dropicles can be generated without ethanol using a similar procedure as used for a PSDS continuous phase.

*Imaging and image processing.* We image dropicles and free drops using fluorescence microscopy to evaluate the formation and uniformity in drop size. For clear visualization, 100  $\mu$ g/mL biotin-4-fluorescein (BF, Catalog number: 50849911, Fisher Scientific) is added to the PBS. We use a custom Python code to analyze the images of the dropicles and free drops. For dropicles, the code detects the fluorescent regions representing drops, filters out regions with size larger than twice or smaller than 0.375 times the nominal size of the particle (corresponding to satellite drops not associated with particles). We measure size/circularity/total intensity for targets, and export an image after filtering, comparing it to the brightfield image for confirmation. For the study of long-term stability, we also filter using circularity to ensure only dropicles are investigated while ignoring spherical satellite drops.

### **Method of reaction inside of dropicles**

We incorporate additional steps in the protocols for drop-carrier particle manufacture and dropicle generation to perform reactions in dropicles: biotinylation of the inner PEG layer and molecular binding in dropicles. In the fabrication step, we use a mix of PEGDA, ethanol, biotin-PEG-acrylate (Catalog number: PG2-ARBN-5k, NANOCS) in DMSO as the precursor polymer for the inner layer to enable grafting of biotin within the PEG layer during photocrosslinking. After fabrication, we rinse the particles, and store them in ethanol. Prior to use, particles are dispersed in PBS with 0.5% w/v Pluronic, and then incubated with a bulk solution of 1 nM Streptavidin-conjugated HRP (Catalog number: N100, Thermo Fisher Scientific). After binding of the streptavidin-HRP and multiple rinsing steps, we reduce the aqueous volume to  $\sim$ <50  $\mu$ L. We mixed ADHP concentrate, enhancer solution, and stable peroxide solution at a ratio of 1:50:50 to make 500  $\mu$ L QuantaRed solution. We perform reactions within dropicles using two approaches. In the first approach, immediately after the mixing step, we inject the QuantaRed solution into the vial, gently agitated for 5 seconds, inject PSDS, and then pipette the solution up and down to generate dropicles in a glass vial, which took < 2 minutes. The brightfield and fluorescence images of dropicles are taken after 30 minutes of incubation. In the second approach, particles suspended in ethanol are added to a 12 well plate (Catalog number: 351143, Corning). Once particles settle in the well, excess ethanol is removed, followed by three washes with PBS with 0.5% w/v Pluronic. Then, 300  $\mu$ l of streptavidin-HRP solution at desired concentrations is added and incubated for a given time period, followed by three additional washes. Next, 500  $\mu$ l of the QuantaRed solution, as described in the first approach, is added to the well to wet the particles, with excess removed immediately. Lastly, 500  $\mu$ l PSDS is added to form isolated dropicles. Next, fluorescence and bright field images of the dropicles in oil are obtained at desired time points using a fluorescence microscope.

## References:

1. Yeh, E.-C., Fu, C.-C., Hu, L., Thakur, R., Feng, J. & Lee, L. P. Self-powered integrated microfluidic point-of-care low-cost enabling (SIMPLE) chip. *Sci Adv.* **3**, e1501645 (2017).
2. Ogunniyi, A. O., Story, C. M., Papa, E., Guillen, E. & Love, J. C. Screening individual hybridomas by microengraving to discover monoclonal antibodies. *Nat Protoc.* **4**, 767-82 (2009).
3. Rondelez, Y., Tresset, G., Tabata, K. V., Arata, H., Fujita, H., Takeuchi, S. & Noji, H. Microfabricated arrays of femtoliter chambers allow single molecule enzymology. *Nat Biotechnol.* **23**, 361-5 (2005).
4. Shen, F., Du, W., Kreutz, J. E., Fok, A. & Ismagilov, R. F., Digital PCR on a SlipChip. *Lab Chip* **10**, 2666-2672 (2010).
5. Lee, C.-C., Snyder, T. M., & Quake, S. R. A microfluidic oligonucleotide synthesizer. *Nucleic Acid Res.* **38**, 2514-2521 (2010).
6. Ottesen, E. A., Hong, J. W., Quake, S. R. & Leadbetter, J. R. Microfluidic digital PCR enables multigene analysis of individual environmental bacteria. *Science* **314**, 1464-7 (2006).
7. Wang, B. L., Ghaderi, A., Zhou, H., Agresti, J., Weitz, D., A., Fink, G. R. & Stephanopoulos, G. Microfluidic high-throughput culturing of single cells for selection based on extracellular metabolite production or consumption. *Nat Biotechnol.* **32**, 473-478 (2014).
8. Beer, N. R. et al. On-chip, real-time, single-copy polymerase chain reaction in picoliter droplets. *Anal Chem.* **79**, 8471-5 (2007).
9. Anna, S. L., Bontoux, N. and Stone, H. A. Formation of dispersions using “flow focusing” in microchannels. *Appl. Phys. Lett.* **82**, 364-6 (2003).
10. Kawakatsu, T., Kikuchi, Y. and Nakajima, M. Regular-sized cell creation in microchannel emulsification by visual microprocessing method. *J Am Oil Chem Soc.* **74**, 317-321 (1997).
11. Unger, M. A., Chou, H. P., Thorsen, T., Scherer, A. and Quake, S. R. Monolithic Microfabricated Valves and Pumps by Multilayer Soft Lithography. *Science* **7**, 113-6 (2000).
12. Song, H., Tice, J. D. & Ismagilov, R. F. A Microfluidic System for Controlling Reaction Networks in Time. *Angew. Chemie Int. Ed.* **42**, 768-772 (2003).
13. Witters, D. et al. Digital biology and chemistry. *Lab Chip* **14**, 3225-32 (2014).
14. Macosko, E. Z. et al. Highly Parallel Genome-wide Expression Profiling of Individual Cells Using Nanoliter Droplets. *Cell* **161**, 1202-1214 (2015).
15. Klein, A. M. et al. Droplet Barcoding for Single-Cell Transcriptomics Applied to Embryonic Stem Cells. *Cell* **161**, 1187-1201 (2015).
16. Bawazer, L. A. et al. Combinatorial microfluidic droplet engineering for biomimetic material synthesis. *Sci. Adv.* **2**, e1600567 (2016).
17. Dressman, D., Yan, H., Traverso, G., Kinzler, K. W. & Vogelstein, B. Transforming single DNA molecules into fluorescent magnetic particles for detection and enumeration of genetic variations. *Proc. Natl. Acad. Sci.* **100**, 8817-8822 (2003).
18. Plesa, C., Sidore, A. M., Lubock, N. B., Zhang, D. & Kosuri, S. Multiplexed gene synthesis in emulsions for exploring protein functional landscapes. *Science* **359**, 343-347 (2018).
19. Collins, D. J., Neild, A., deMello, A., Liu, A.-Q. & Ai, Y. The Poisson distribution and beyond: methods for microfluidic droplet production and single cell encapsulation. *Lab Chip* **15**, 3439-3459 (2015).
20. Dinsmore, A. D. et al. Colloidosomes: selectively permeable capsules composed of colloidal particles. *Science* **298**, 1006-9 (2002).
21. Chevalier, Y. & Bolzinger, M.-A. Emulsions stabilized with solid nanoparticles: Pickering emulsions. *Colloids Surfaces A Physicochem. Eng. Asp.* **439**, 23-34 (2013).
22. Baret, J. C. Surfactants in droplet-based microfluidics. *Lab Chip* **12**, 422-33 (2012).
23. Holtze, C. et al. Biocompatible surfactants for water-in-fluorocarbon emulsions. *Lab Chip* **8**, 1632-9 (2008).
24. Zhihong Nie, Z., Park, J. I., Li, W., Bon, S. A. F. & Kumacheva, E. An “Inside-Out” Microfluidic Approach to Monodisperse Emulsions Stabilized by Solid Particles, *J. Am. Chem. Soc.* **130**, 16508-16509 (2008).

- 519 25. Pan, M., Lyu, F. & Tang, S. K.Y. Fluorinated Pickering Emulsions with Non-adsorbing Interfaces  
520 for Droplet-based Enzymatic Assays. *Anal Chem.* **87**, 7938–7943 (2015).
- 521 26. Minimal surface configurations for axisymmetric microparticles. Ha, K., et al. (in preparation).
- 522 27. Wu, C.-Y., Owsley, K. & Di Carlo, D. Rapid Software-Based Design and Optical Transient Liquid  
523 Molding of Microparticles. *Adv. Mater.* **27**, 7970–7978 (2015).
- 524 28. Wu, C.-Y. et al. Shaped 3D microcarriers for adherent cell culture and analysis. *Microsystems*  
525 *Nanoeng.* **4**, 21 (2018).
- 526 29. Paulsen, K. S. & Chung, A. J. Non-spherical particle generation from 4D optofluidic fabrication.  
527 *Lab Chip*, **16**, 2987-2995 (2016).
- 528 30. Baek, T. J., Kim, N. H., Choo, J. & Seong, G. H. Photolithographic Fabrication of Poly(Ethylene  
529 Glycol) Microstructures for Hydrogel-based Microreactors and Spatially Addressed Microarrays. *J.*  
530 *Microbiol. Biotechnol.* **17**, 1826-1832 (2007).
- 531 31. Skhiri, Y. et al. Dynamics of molecular transport by surfactants in emulsions. *Soft Matter*, **8**, 10618-  
532 10627 (2012).
- 533 32. Gruner, P., Riechers, B., Semin, B., Lim, J., Johnston, A., Short, K. & Baret, J.-C. Controlling  
534 molecular transport in minimal emulsions. *Nat Commun.* **7**, 10392 (2016).
- 535 33. Dong, L., Agarwal, A. K., Beebe, D. J. & Jiang, H. Adaptive liquid microlenses activated by stimuli-  
536 responsive hydrogels. *Nature* **442**, 551–554 (2006).
- 537 34. Liu, B., Wang, B., Zhao, R., Tong, Y. & Wei, G.-W. ESES: Software for Eulerian solvent excluded  
538 surface. *J. Comput. Chem.* **38**, 446–466 (2017).
- 539 35. Jacobs, M., Merkurjev, E. & Esedoğlu, S. Auction dynamics: A volume constrained MBO scheme.  
540 *J. Comput. Phys.* **354**, 288–310 (2018).
- 541 36. Lorensen, W. E., Cline, H. E., Lorensen, W. E. & Cline, H. E. Marching cubes: A high resolution 3D  
542 surface construction algorithm. in *Proc. 14th Annu. Conf. Comput. Graph. Interact. Tech. - SIGGRAPH*  
543 *'87* **21**, 163–169 (ACM Press, 1987).
- 544 37. Dendukuri, D., Hatton, T. A. & Doyle, P. S. Synthesis and self-assembly of amphiphilic polymeric  
545 microparticles. *Langmuir* **23**, 4669–74 (2007).
- 546 38. Stoecklein, D., Owsley, K., Wu, C.-Y., Di Carlo, D. & Ganapathysubramanian, B. uFlow: software  
547 for rational engineering of secondary flows in inertial microfluidic devices. *Microfluid. Nanofluid.* **22**,  
548 74 (2018).
- 549 39. Stoecklein, D., Wu, C.-Y., Owsley, K., Xie, Y., Di Carlo, D. & Ganapathysubramanian, B.,  
550 Micropillar sequence designs for fundamental inertial flow transformations. *Lab Chip* **14**, 4197-4204  
551 (2014).
- 552
- 553

## 554 Acknowledgments:

555 **Funding:** We acknowledge support from the National Institutes of Health Grant #R21GM126414 and  
556 the Simons Foundation Math+X Investigator Award #510776.

557

558 **Author contributions:** D.D. conceived of the overall concept of DCPs and dropicles. C.-Y.W. further  
559 developed the initial idea, conceived and implemented the fabrication approach to create DCPs,  
560 designed protocols to form dropicles, performed experiments, and analyzed data. J.D. and C.-Y.W.  
561 performed microgel encapsulation experiments. M.O. developed protocols for dropicle formation and  
562 conducted enzymatic amplification and cross-talk experiments. A.J. and J.D. conducted scaled-up  
563 experiments and analysis. B.W., M.J. and A.L.B. developed the numerical model and performed  
564 modeling of minimal energy configurations. K.H. and A.L.B. developed the analytical framework. All  
565 authors contributed to analyzing and interpreting data to formulate the theoretical framework. D.D.  
566 wrote the manuscript. C.-Y.W. designed and prepared initial figures. J.D. and D.D. contributed  
567 additional figures and modifications. All authors contributed to writing and editing the manuscript and  
568 design of the figures. A.L.B. and D.D. supervised the project.

569

570

571  
572  
573

**Competing interests:** Authors declare no competing interests.

Correspondence and requests for materials should be addressed to D. D. ([dicarlo@ucla.edu](mailto:dicarlo@ucla.edu)).

574 **Figures**

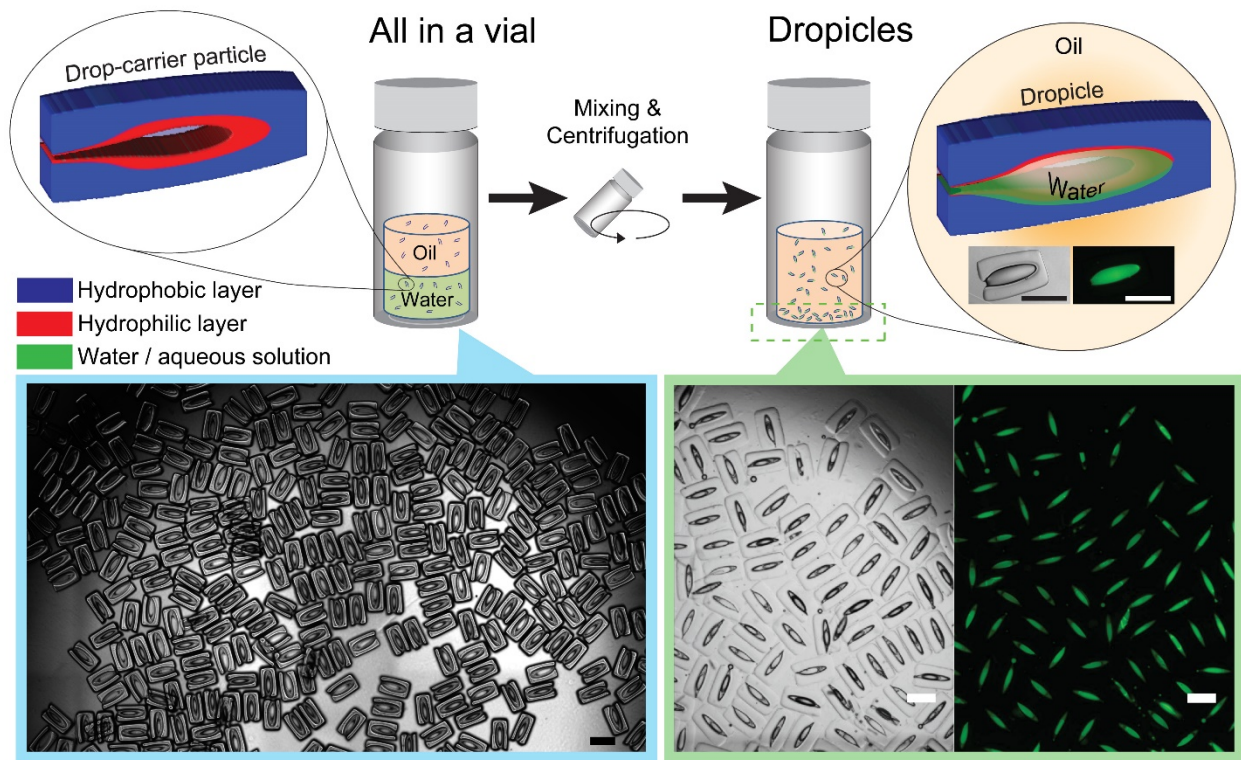

575  
576  
577  
578  
579  
580  
581  
582  
583  
584

**Fig. 1.** Simultaneous formation of monodisperse droplets by batch mixing and centrifugation operations. Drop-carrier particles (DCPs) are manufactured with poly(ethylene glycol) and poly(propylene glycol) as the hydrophilic and hydrophobic layers respectively. A collection of DCPs is shown suspended in ethanol on the left. Droplets with aqueous solution containing fluorescent dye in a toluene continuous phase, shown in the bottom of a vial on the right with brightfield and fluorescence channels. Insets in the right show a single droplet in brightfield and FITC channels. All scale bars are 500 μm.

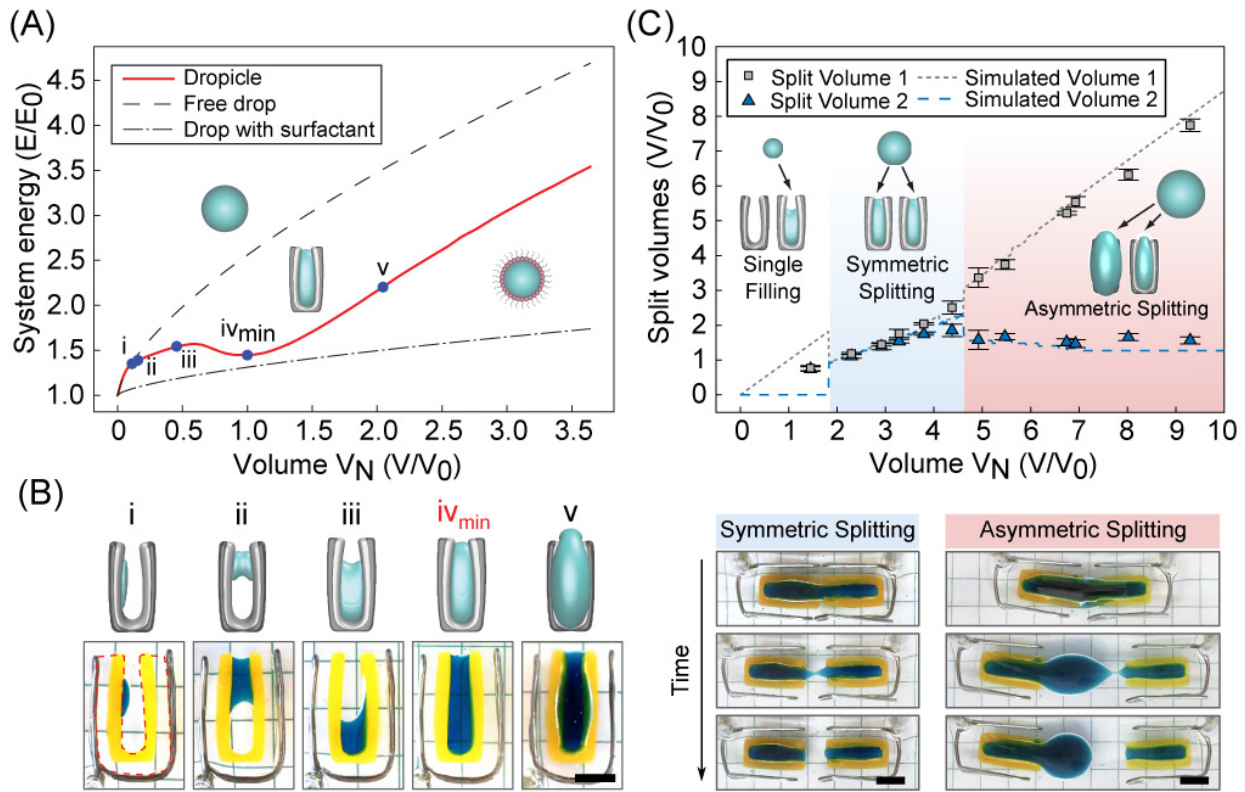

585

586

587

588

589

590

591

592

593

594

595

596

597

598

599

600

601

602

603

604

**Fig. 2.** Physics of dropicle generation. **(A)** Simulated Volume - Energy (V-E) curves showing that free drops and surfactant stabilized drops in an immiscible solution possess monotonically increasing energies with  $V^{2/3}$ , resulting in a thermodynamic driving force for coalescence. Drop-carrier particles (solid red line), however, possess a V-E curve with a local minimum when the drop-carrier particle is substantially filled with fluid (iv). Other configurations of filling are shown along the curve (i-v). The energy and volume corresponding to the local minimum are defined as  $E_0$  and  $V_0$ . **(B)** Aqueous volumes (blue dye) form different minimal surface shapes when interacting with centimeter-sized DCPs depending on filling volume. The numerical model predictions for (i) to (v) according to (A) and the experimental morphologies of spherical cap, bridge (catenoid), partial filling, and complete filling are shown on the bottom and top respectively. **(C)** Based on the V-E curve in **A**, splitting of a drop between two drop-carrier particles is theoretically expected to depend on the overall fluid volume (dashed lines), with three regimes of splitting behavior expected. Experimental results (symbols) for centimeter-sized DCPs agree with predictions such that splitting is symmetric within a range of volumes from 2-4, while one daughter droplet is maintained at a preferred split volume above a critical total volume,  $V_N > \sim 4$ . Time lapse images are shown for representative experiments in the symmetric and asymmetric splitting regimes.

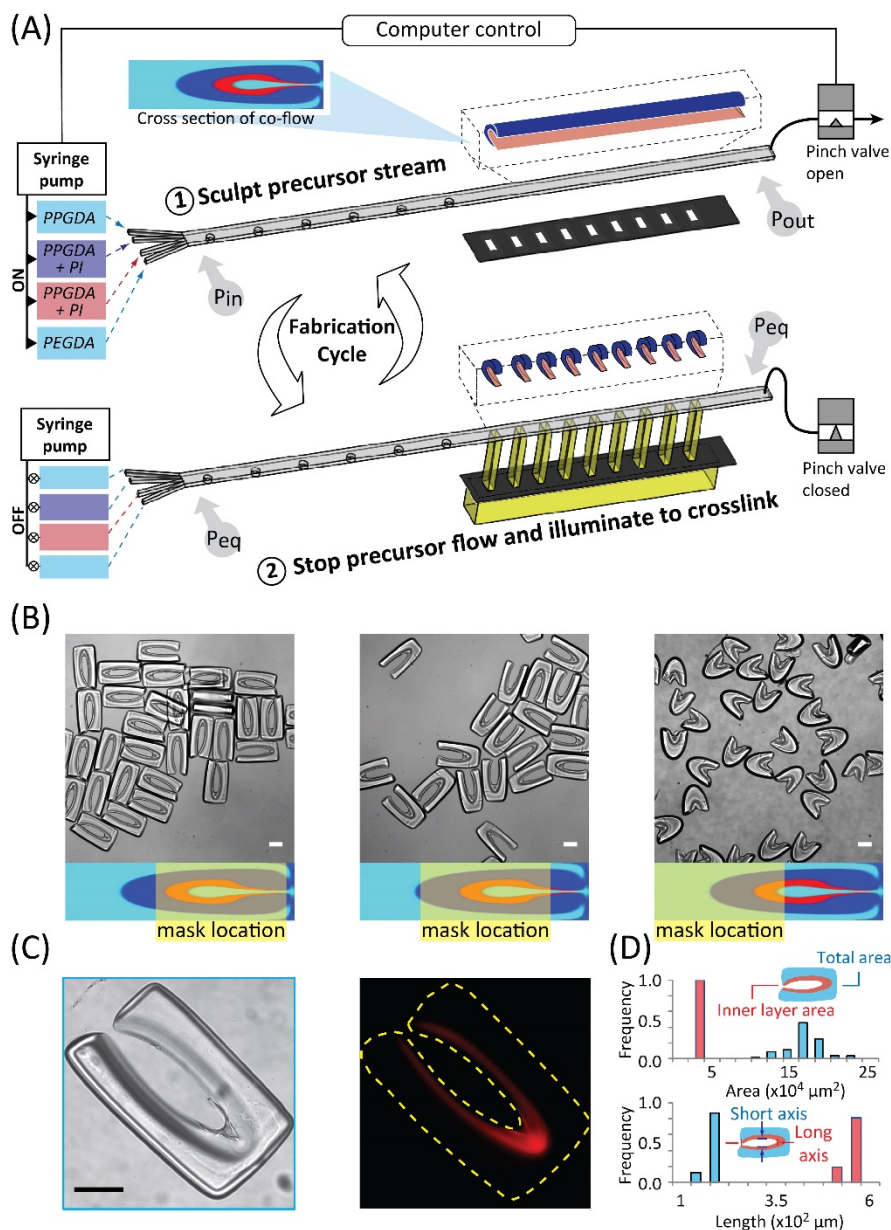

605

606

607

608

609

610

611

612

613

614

615

616

617

618

619

620

**Fig. 3.** Manufacturing of microscale drop-carrier particles with uniform dimensions. **(A)** Polymer precursors of poly (ethylene glycol) diacrylate (PEGDA) and poly (propylene glycol) diacrylate (PPGDA) are co-flowed with and without photoinitiator. The co-flowing streams are shaped using inertial flow sculpting to create a concentric C-shaped structure in the cross-section of the flow with PEGDA internal to PPGDA. A pinch valve is then closed to stop the flow leading to pressure at the inlet ( $P_{in}$ ) and outlet ( $P_{out}$ ) to equalize to an equilibrium pressure,  $P_{eq}$ . The sculpted stream is exposed to ultraviolet (UV) light through a mask to polymerize the PEGDA and PPGDA regions mixed with photoinitiator (PI). The valve is opened and polymerized particles are collected before the cycle is repeated. **(B)** Images of three types of DCPs manufactured by shifting the patterned UV mask along a direction perpendicular to the precursor flow. Enclosed DCPs, shown on the left, are used for most of the studies in this work. **(C)** Brightfield and fluorescent images of a DCP after incubation with resorufin, a red fluorescent molecule which partitions into the inner PEG layer. **(D)** DCP dimensions are reported for a batch of 90 particles, showing the uniformity of the manufacturing process. Scale bars are 100  $\mu\text{m}$ .

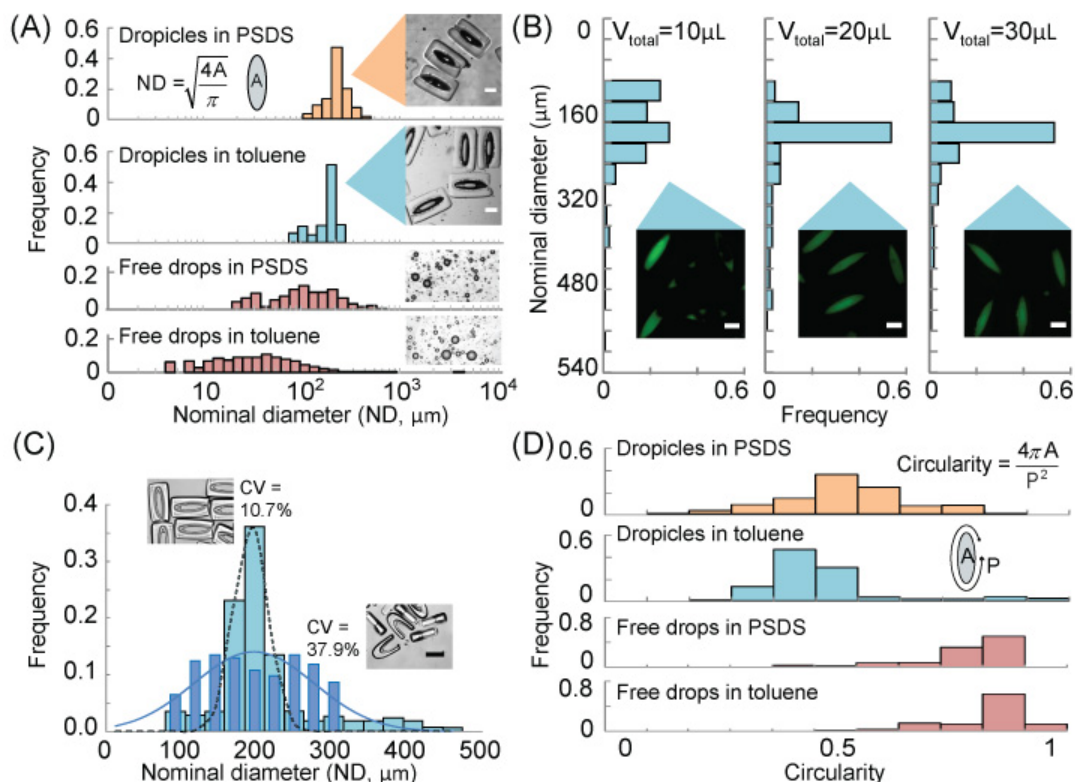

621

622

623

624

625

626

627

628

629

630

631

632

633

634

**Fig. 4.** Formation of uniform droplets. (A) Histograms of drop nominal diameters (ND) for droplets formed in PSDS and toluene. Histograms of free drops in PSDS and toluene stabilized by 0.5% Pluronic surfactant show a much wider distribution in ND (> 100% CV). (B) Effect of aqueous volume on droplet formation. When the volume of the aqueous phase is too low it affects the distribution of nominal diameters among droplets. The distribution in ND appears to saturate with a mode at 200  $\mu\text{m}$  once the aqueous fluid reaches 20  $\mu\text{L}$  (~20 fold of the total holding volume of the particles). (C) Histograms of nominal diameter for enclosed particles and open particles. Increased uniformity is observed for enclosed particles. (D) Histograms of a shape metric, i.e., circularity, for droplets and free drops, showing that droplets also are stabilized with a unique non-spherical morphology defined by the engineered template. All scale bars are 100  $\mu\text{m}$ .



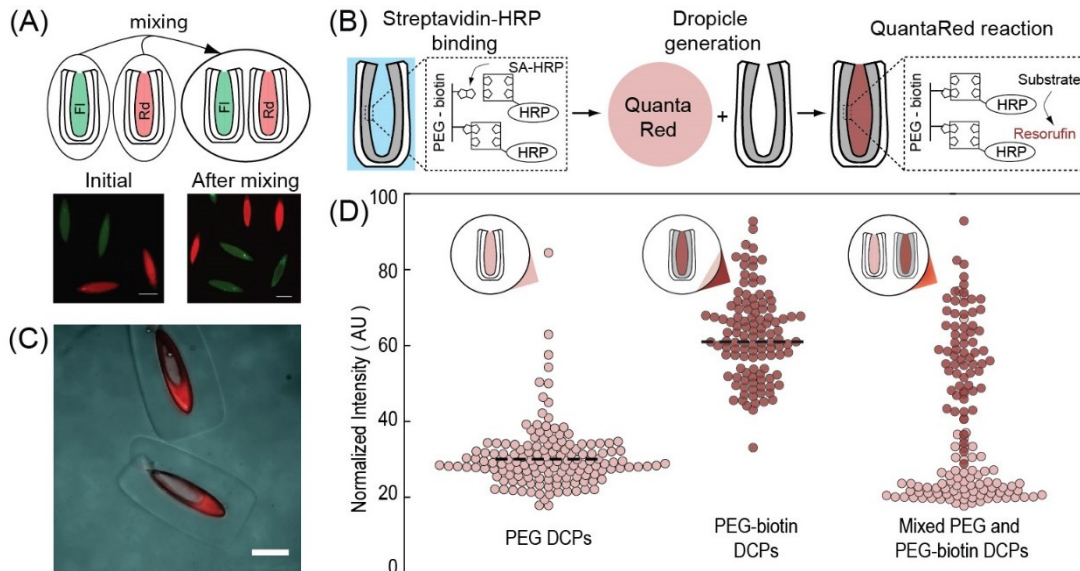

635

636

637

638

639

640

641

642

643

644

645

646

647

**Fig. 5.** Molecular isolation and enzymatic reactions in droplets. **(A)** Images taken after introduction and before agitation (left), and after agitation (right) of two groups of droplets loaded with either biotin-4-fluorescein (F1, 0.6 kDa, green) or rhodamine B isothiocyanate dextran (Rd, 70 kDa, red) in toluene continuous phase. The dyes do not transfer between droplets following loading. **(B)** Schematic of the HRP-catalyzed reaction of QuantaRed reagent in which resorufin accumulates within the droplet. **(C)** Fluorescence images showing the generation of resorufin in droplets. Fluorescence intensity in the PEG layer increases significantly with the presence of HRP, and is higher than in the surrounding aqueous solution in the droplet. **(D)** Particles manufactured with and without biotin show selective affinity for streptavidin-HRP and differential generation of resorufin fluorescence. Mixed particles show similar intensity levels to particles in separate wells, indicating minimal cross-talk of generated fluorescent product in a PSDS continuous phase. The dashed lines show the mean for particles with and without affinity to streptavidin. All scale bars are 200  $\mu\text{m}$ .

648  
649

## Supplementary Materials

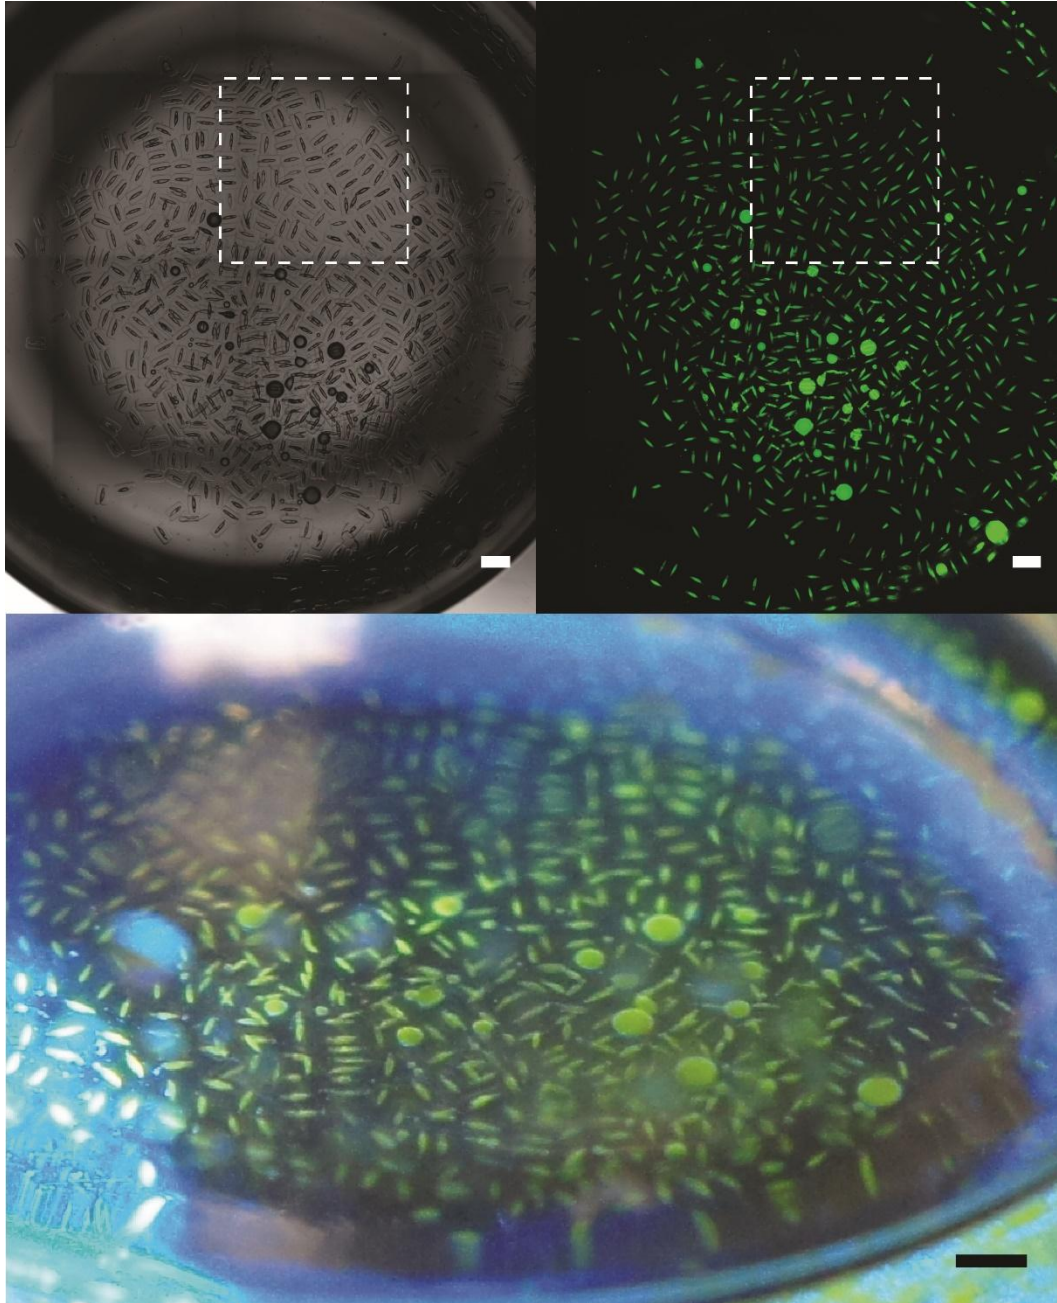

650

651

652

653

654

655

656

657

658

**Supplementary Fig. 1.** Monodisperse dropicles. Drop-carrier particles, aqueous solution containing FITC-dextran, and oil phases were simply mixed in a scintillation vial and centrifuged down to generate dropicles. The top row insets show stitched brightfield and fluorescence images of the entire vial generated using a microscopy. The white squares outline the areas highlighted in Fig. 1. The bottom image shows an image of the vial from an angle using a standard camera. The top and bottom scale bars are 1 and 2 mm respectively.

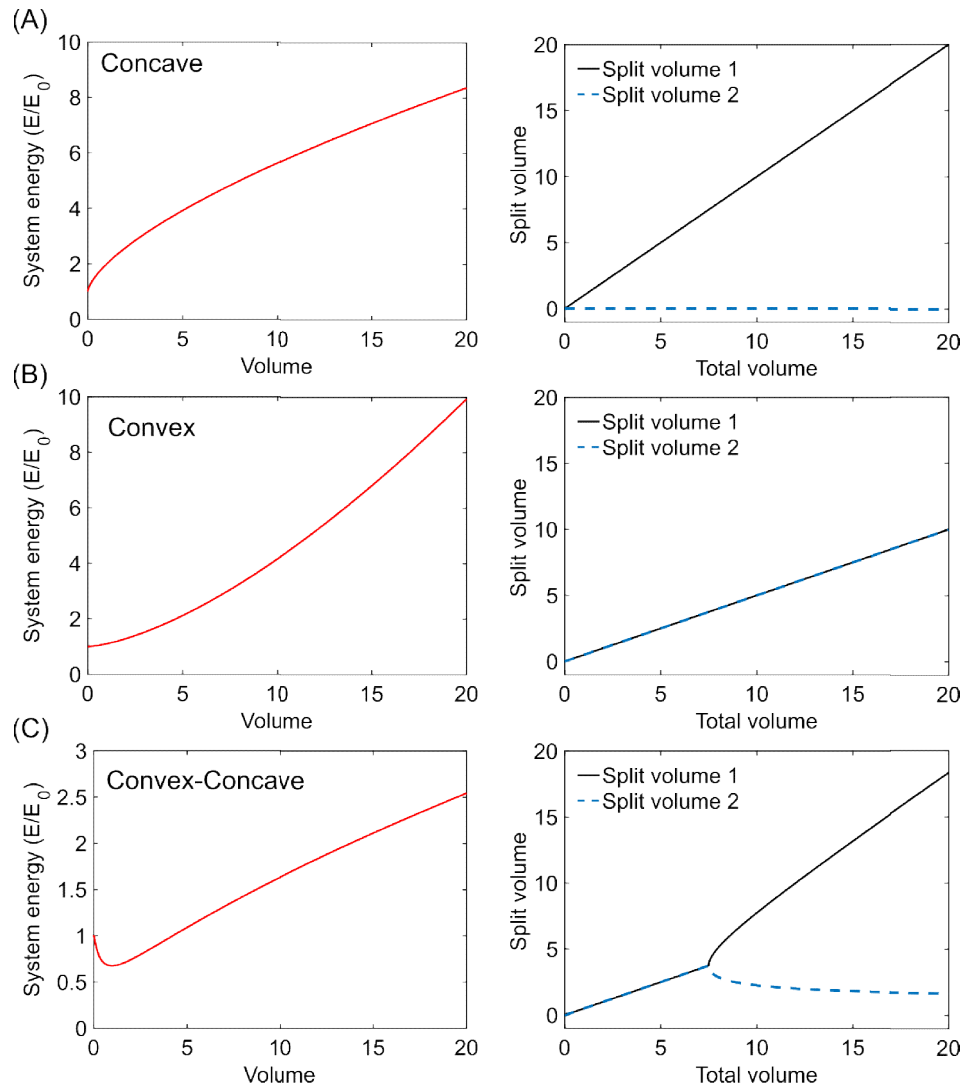

659

660

661

662

663

664

665

666

667

668

669

**Supplementary Fig. 2.** Example volume energy (V-E) curves and corresponding volume splitting plots. (A) For concave V-E curves (e.g. a spherical droplet) it is energetically favorable for volumes to coalesce into a single volume in order to minimize surface area. Equation of the V-E curve:  $E = V^{\frac{2}{3}} + 1$  (B) For convex V-E curves it is energetically more favorable for a volume to split into equal volumes. This case also results in no preferred drop volume. Equation of the V-E curve:  $E = 0.1V^{\frac{3}{2}} + 1$  (C) For the case of a V-E curve that transitions from convex to concave, there is an initial volume regime over which droplets split evenly (similar to the purely convex case). However, once the volume reaches twice the volume of the inflection point ( $V = 2V_1 = 7.5$ ), volumes split asymmetrically. Here the total volume splits into two volumes, a preferred smaller volume occurring over a large range of total volumes, and a larger volume containing the remaining volume. Equation of the V-E curve:  $E = \frac{0.1}{0.1 + \frac{V}{5}} + \left(\frac{V}{5}\right)^{\frac{2}{3}}$

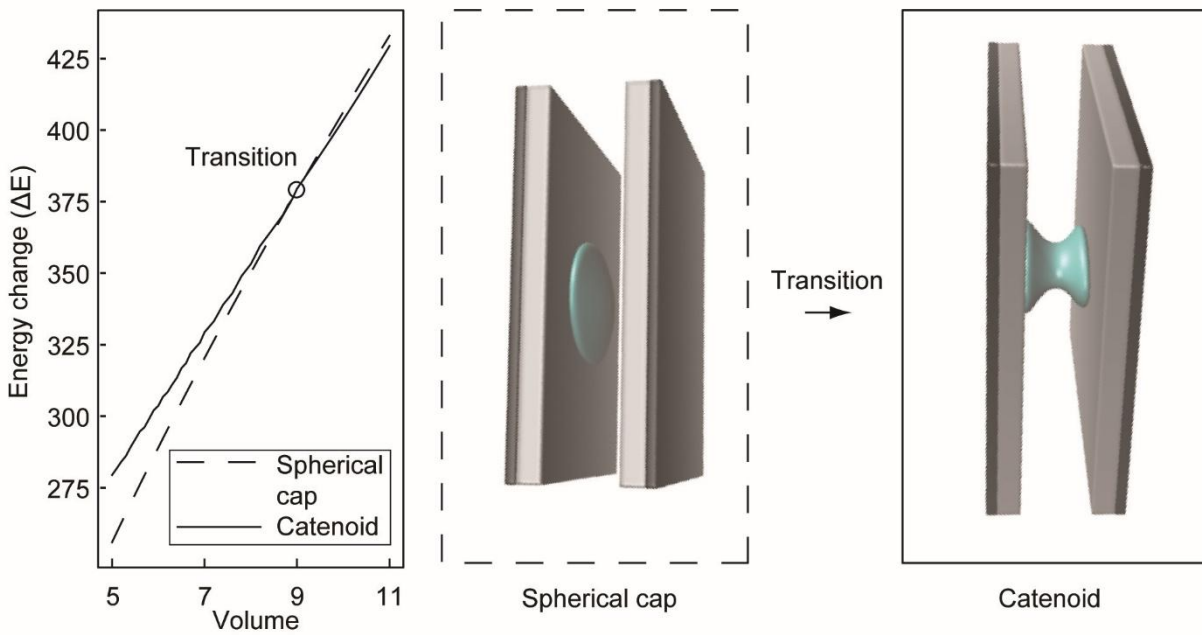

670  
671  
672  
673  
674  
675  
676  
677

**Supplementary Fig. 3.** System energy of a drop confined by parallel plates transitioning from a spherical cap to catenoid. The behavior of an aqueous drop with increasing volume is shown using a simplified model of two parallel plates confining the drop with a hydrophilic inner-facing layer. There is a change in morphology of the drop at equilibrium from a spherical cap to a catenoid bridging between the surface, which leads to a change in slope of the V-E curve, however, both remain concave. As shown in Supplementary Fig. 2, additional features in the V-E curve are needed to support monodisperse drops.

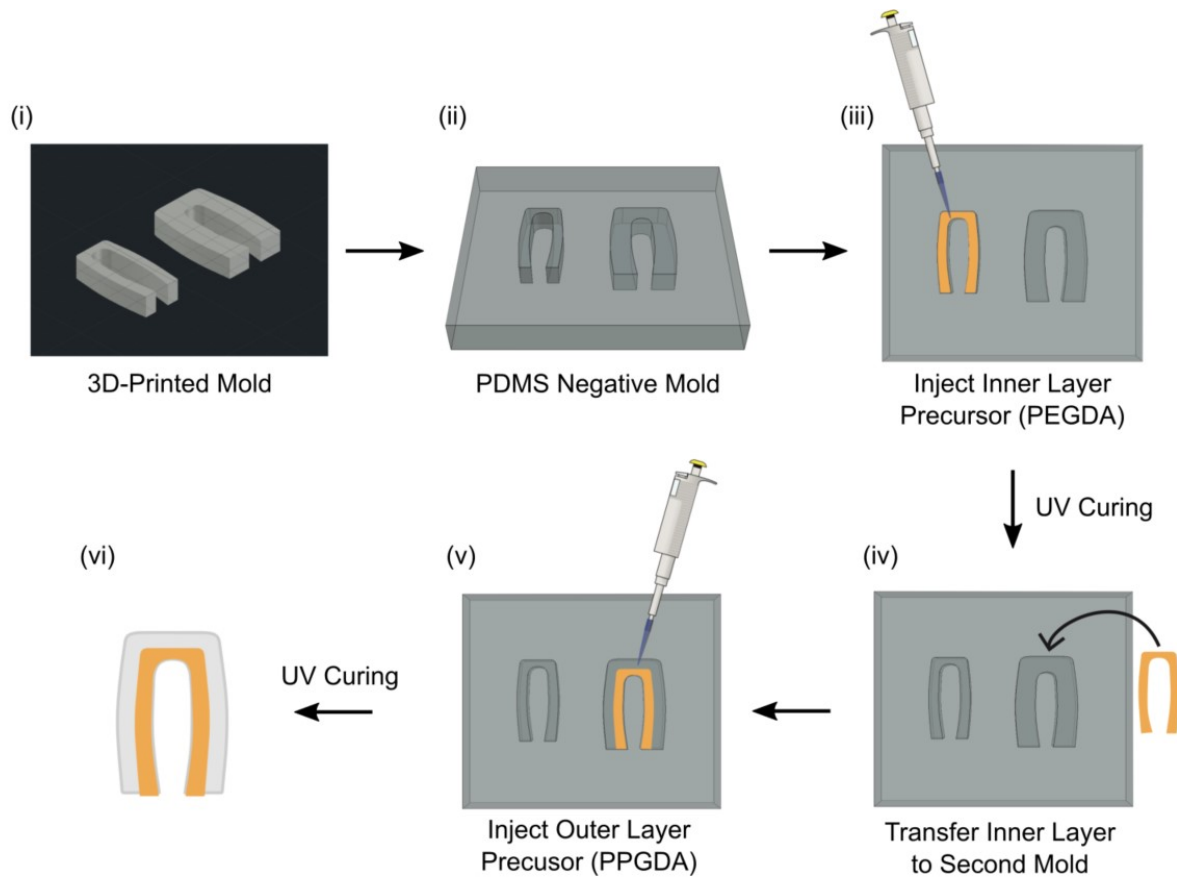

678

679

680

681

682

683

684

685

686

**Supplementary Fig. 4.** Macro-scale drop-carrier particle (DCP) fabrication process. (i) A positive mold is first printed using an SLA 3D printer (Form 2, Formlabs). (ii) A negative mold is fabricated from the 3D printed mold using PDMS. (iii) PEGDA is pipetted into the smaller mold and crosslinked with UV light (40s, 250 mW/cm<sup>2</sup>) to create the inner layer of the DCP. (iv) The inner layer is transferred into the larger mold, PPGDA is pipetted into the remaining space and crosslinked using UV light (40s, 250 mW/cm<sup>2</sup>). (iv) The resulting amphiphilic DCP is removed from the mold and washed with ethanol prior to volume filling or volume splitting experiments.

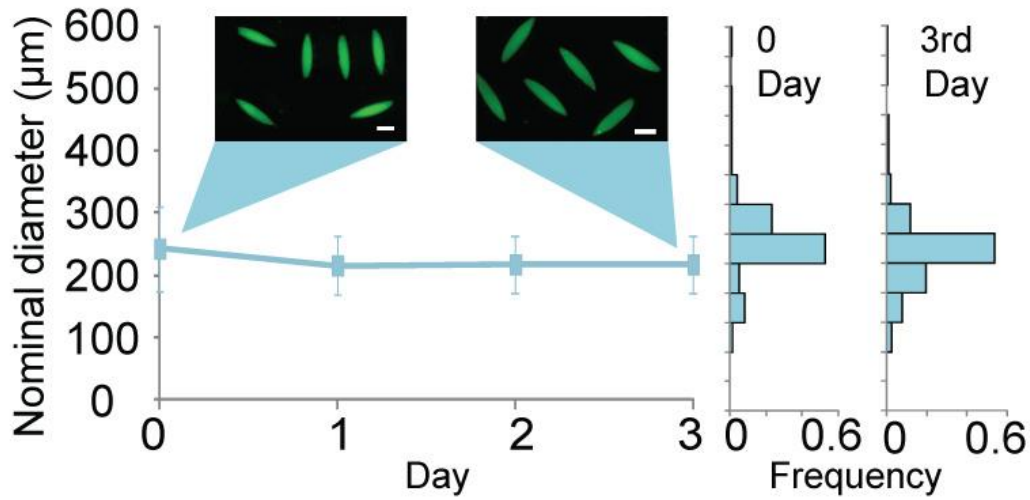

687

688

689

690

691

**Supplementary Fig. 5.** Long term stability of droplets in toluene continuous phase. The droplets with fluorescein-containing aqueous solution were generated and imaged on day 0 and day 3. The size distribution of droplets over three days remains stable. The scale bar is 200 μm.

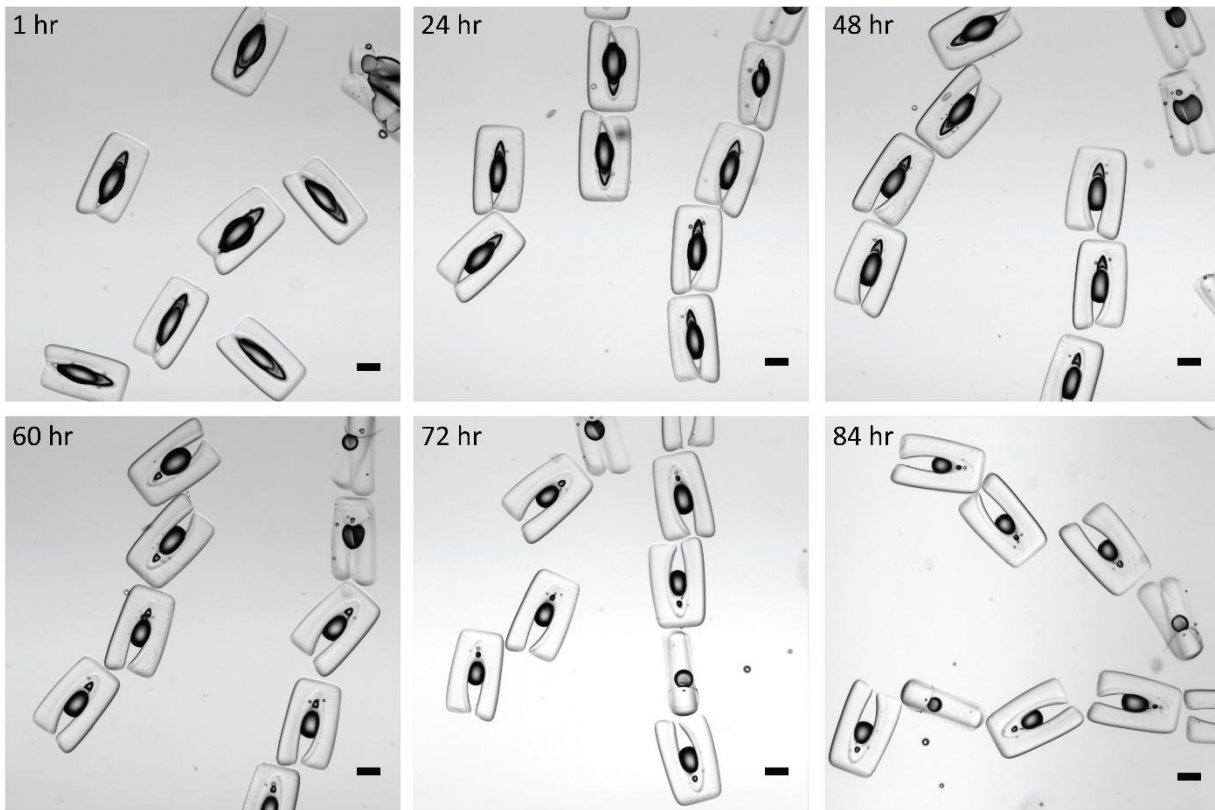

692

693

694

695

696

697

698

**Supplementary Fig. 6.** Images of aqueous dropicles formed within PSDS oil are shown over 3 days. The images indicate that the volume can be maintained over several days. A slow reduction in the volume of templated drops is presumably due to dissolution of water in the oil phase and evaporation over time. Scale bar is 200 μm.

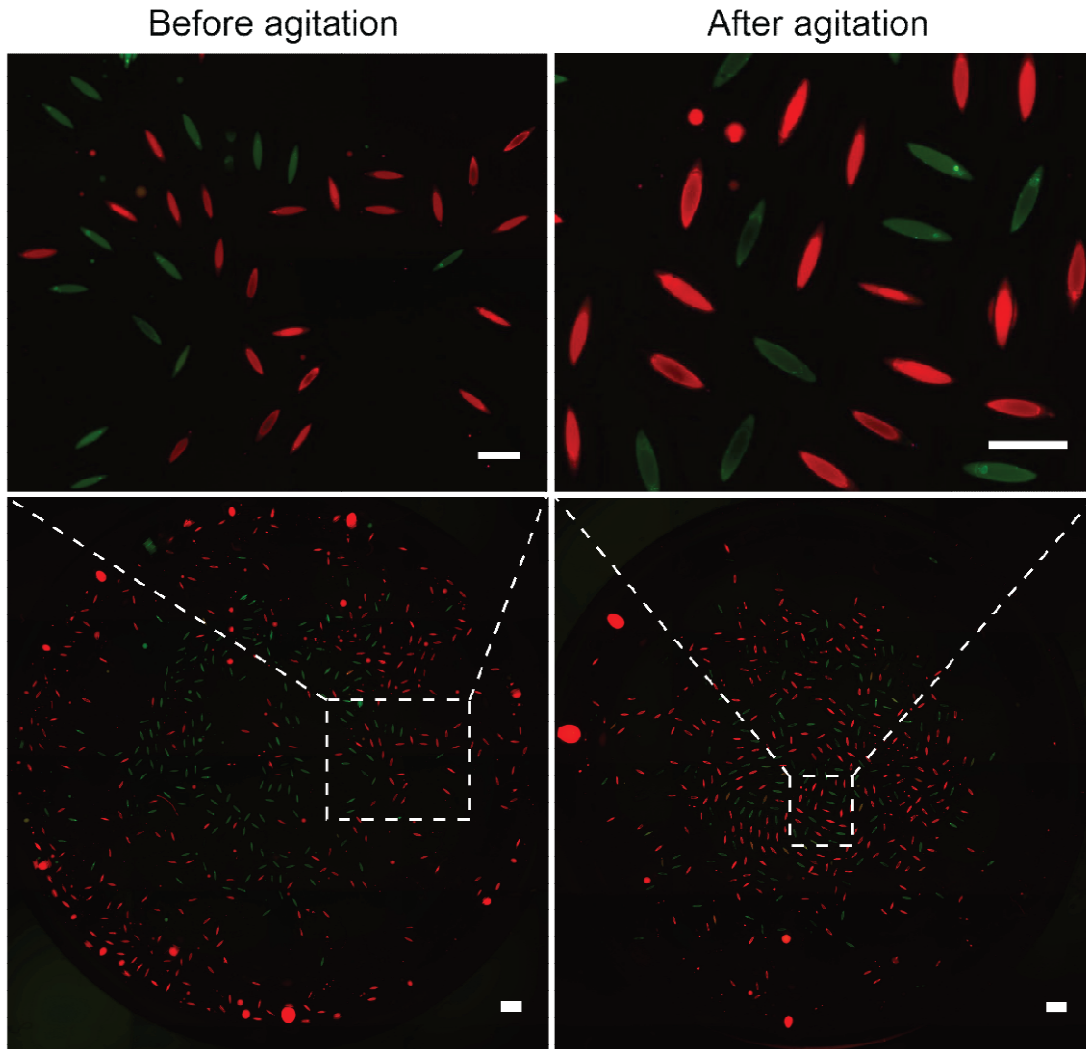

699  
700  
701  
702  
703  
704  
705  
706  
707  
708

**Supplementary Fig. 7.** Inhibition of solution exchange between dropicles. We generated dropicles with 10  $\mu\text{g}/\text{mL}$  biotin-4-fluorescein (BF) and 1  $\text{mg}/\text{mL}$  rhodamine B isothiocyanate dextran (RBD) separately in two vials. We introduced  $\sim 0.5$  mL of dropicle-laden solution from each vial into a new vial. We imaged the blended dropicles in both FITC and TRITC channels before and after shaking the vial on a standard analog shaker (VWR) for 4 minutes. Before and after agitation, only green and red fluorescent drops were observed in the overlay images, indicating there was no transport of dye between solid boundary-protected drops. The scale bars in the top and bottom rows are 500 and 1000  $\mu\text{m}$  respectively.



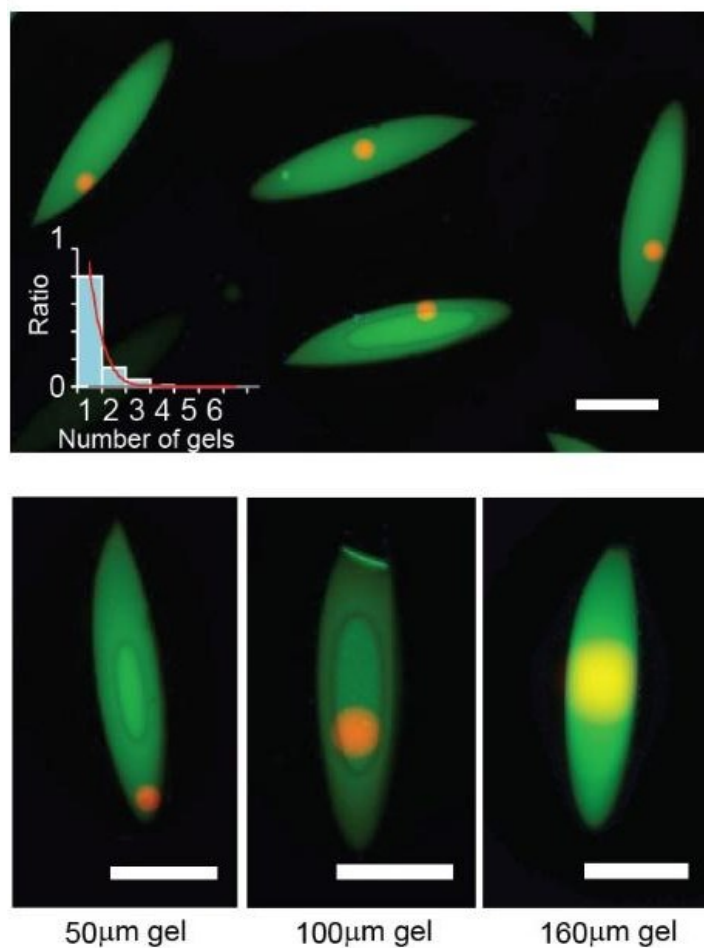

709  
710  
711  
712  
713  
714

**Supplementary Fig. 8.** Images of spherical microgels encapsulated in dropicles. The distribution in the number of gels loaded in the dropicles follows a Poisson distribution (inset graph, histogram is experimental results, red line is Poisson distribution). Isolation statistics are independent of size provided the gel is smaller than the drop-carrier particle opening. Microgels are manufactured as described in: de Rutte et al. *Advanced Functional Materials*. (2019): 1900071.
